# Supplementary material for: The Role of Parental Adherence to the Mediterranean Diet and Family Time Together on Children's Weight Status: the BeE-school Project
Source: Preprints.org preprint supplement (doi:10.20944/preprints202402.1511.v1), 2024-02-27
Supplement: Supplementary file 1 [file supplementary]

**Supplemmentary table**

Table 1. Binary logistic regression analysis of the associations between children's weight status with the interaction MEDAS*highest parents education level.

|  | Children’s weight status |
| --- | --- |
| Interaction MEDAS*highest parents education level | **0.328(0.121; 0.892)+** |

**Note:** values expressed as OR (CI 95%). Variables in the model: MEDAS (categorical) and highest parents education level (categorical). **+p-value=0.029**
